# Supplementary material
Source: PubMed Central journal article supplement (PMC4148454)

## Table of Contents

### **On-demand optical immobilization of *Caenorhabditis elegans* for high-resolution imaging and microinjection**

Hyundoo Hwang<sup>a</sup>, Jan Krajniak<sup>a</sup>, Yohei Matsunaga<sup>b</sup>, Guy Benian<sup>b</sup>, and Hang Lu<sup>acd\*</sup>

This paper describes a novel worm immobilization technique based on optical control of sol-gel transition of thermoreversible Pluronic gel, providing simple, versatile, and biocompatible ways for long-term high-resolution imaging and microinjection of *Caenorhabditis elegans*.

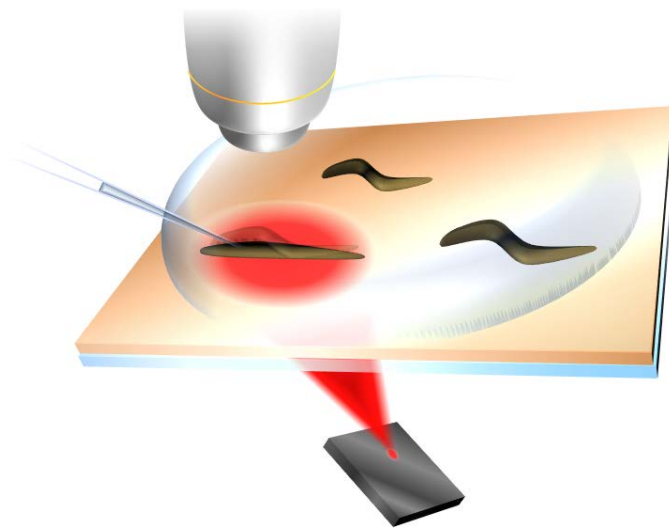

Supplement: NIHMS616432-supplement-Graphical_Abstract.pdf [file NIHMS616432-supplement-Graphical_Abstract.pdf]
